# Supplementary material for: Construction of regio- and stereoregular poly(enaminone)s by multicomponent tandem polymerizations of diynes, diaroyl chloride and primary amines
Source: Royal Society of Chemistry journal article supplement (doi:10.1039/c5py00477b), 2015-01-01
Supplement: c5py00477b1.pdf [file c5py00477b1.pdf]

Electronic Supporting Information

**Construction of regio- and stereoregular poly(enaminone)s by multicomponent tandem polymerizations of diynes, diaroyle chloride and primary amines**

Haiqin Deng,<sup>ab</sup> Rongrong Hu,<sup>ac</sup> Anakin C. S. Leung,<sup>ab</sup> Engui Zhao,<sup>ab</sup> Jacky W. Y. Lam,<sup>\*ab</sup> and Ben Zhong Tang<sup>\*abc</sup>

<sup>a</sup> Department of Chemistry, Institute for Advanced Study, Institute of Molecular Functional Materials, Division of Biomedical Engineering, Division of Life Science and State Key Laboratory of Molecular Neuroscience, The Hong Kong University of Science & Technology (HKUST), Clear Water Bay, Kowloon, Hong Kong

<sup>b</sup> HKUST-Shenzhen Research Institute, No. 9 Yuexing 1st RD, South Area, Hi-tech Park, Nanshan, Shenzhen 518057, China

<sup>c</sup> Guangdong Innovative Research Team, SCUT-HKUST Joint Research Laboratory, State Key Laboratory of Luminescent Materials and Devices, South China University of Technology (SCUT), Guangzhou 510640, China

**Table contents**

**Table S1** Crystal data and structure refinement for model compound **4**.

**Fig. S1** Frontier orbital theory for the PET effect.

**Table S2** The quantum yields of **4** and **P1a–b/2/3a–b** in solution and aggregate state.

**Table S1** Crystal data and structure refinement for model compound **4**.

|                                   |                                                         |                                                        |
|-----------------------------------|---------------------------------------------------------|--------------------------------------------------------|
| Empirical formula                 | C <sub>41</sub> H <sub>37</sub> NO                      |                                                        |
| Formula weight                    | 559.72                                                  |                                                        |
| Temperature                       | 99.9(3) K                                               |                                                        |
| Wavelength                        | 1.5418 Å                                                |                                                        |
| Crystal system                    | Triclinic                                               |                                                        |
| Space group                       | P-1                                                     |                                                        |
| Unit cell dimensions              | a = 9.8924(6) Å<br>b = 10.2910(7) Å<br>c = 15.6015(6) Å | α = 91.437(4)°.<br>β = 94.959(4)°.<br>γ = 101.331(5)°. |
| Volume                            | 1550.04(15) Å <sup>3</sup>                              |                                                        |
| Z                                 | 2                                                       |                                                        |
| Density (calculated)              | 1.199 Mg/ m <sup>3</sup>                                |                                                        |
| Absorption coefficient            | 0.540 mm <sup>-1</sup>                                  |                                                        |
| F(000)                            | 596                                                     |                                                        |
| Crystal size                      | 0.15 × 0.12 × 0.12 mm <sup>3</sup>                      |                                                        |
| Theta range for data collection   | 4.39 to 67.97°.                                         |                                                        |
| Index ranges                      | -11 ≤ h ≤ 11, -12 ≤ k ≤ 12, -18 ≤ l ≤ 13                |                                                        |
| Reflections collected             | 8563                                                    |                                                        |
| Independent reflections           | 5512 [R(int) = 0.0402]                                  |                                                        |
| Completeness to theta = 66.50°    | 98.50 %                                                 |                                                        |
| Absorption correction             | Semi-empirical from equivalents                         |                                                        |
| Max. and min. transmission        | 1.00000 and 0.82158                                     |                                                        |
| Refinement method                 | Full-matrix least-squares on F <sup>2</sup>             |                                                        |
| Data / restraints / parameters    | 5512 / 0 / 388                                          |                                                        |
| Goodness-of-fit on F <sup>2</sup> | 1.002                                                   |                                                        |
| Final R indices [I > 2σ(I)]       | R1 = 0.0453, wR2 = 0.1200                               |                                                        |
| R indices (all data)              | R1 = 0.0546, wR2 = 0.1270                               |                                                        |
| Largest diff. peak and hole       | 0.196 and -0.258 e.Å <sup>-3</sup>                      |                                                        |

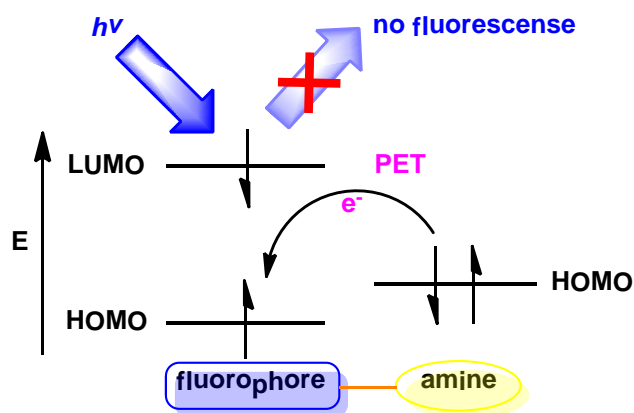**Fig. S1** Frontier orbital theory for the PET effect.

**Table S2** The quantum yields of **4** and **P1a–b/2/3a–b** in solution and aggregate state.

| compd           | $\Phi_F^a$ (%) |      |
|-----------------|----------------|------|
|                 | soln           | aggr |
| <b>4</b>        | 0.05           | 1.05 |
| <b>P1a/2/3a</b> | 0.30           | 1.16 |
| <b>P1b/2/3a</b> | 0.21           | 0.61 |
| <b>P1a/2/3b</b> | 0.20           | 0.55 |

<sup>a</sup> $\Phi_F$  = fluorescence quantum yield (%) in dilute THF solution (soln) and THF/water mixture with 90% water fraction (aggr) determined by a calibrated integrating sphere, respectively. Solution concentration: 100  $\mu$ M.
